# Supplementary material for: Enhancing ReaxFF for molecular dynamics simulations of lithium-ion batteries: an interactive reparameterization protocol
Source: Springer Nature journal article supplement (doi:10.1038/s41598-023-50978-5), 2024-01-10
Supplement: MOESM1 [file 41598_2023_50978_MOESM1_ESM.pdf]

# Enhancing ReaxFF for Molecular Dynamics Simulations of Lithium-Ion Batteries: An interactive reparameterization protocol (Supplementary Material)

Paolo De Angelis<sup>1,\*</sup>, Roberta Cappabianca<sup>1</sup>, Matteo Fasano<sup>1</sup>, Pietro Asinari<sup>1,2,†</sup>, and Eliodoro Chiavazzo<sup>1,‡</sup>

<sup>1</sup>Department of Energy “Galileo Ferraris”, Politecnico di Torino, Corso Duca degli Abruzzi 24, 10129 Torino, Italy.

<sup>2</sup>Istituto Nazionale di Ricerca Metrologica, Strada delle Cacce 91, 10135 Torino, Italy.

\*paolo.deangelis@polito.it

†pietro.asinari@polito.it

‡eliodoro.chiavazzo@polito.it

This is the supplementary material for the article “Enhancing ReaxFF for Molecular Dynamics Simulations of Lithium-Ion Batteries: An interactive reparameterization protocol.” Here we list resources and images that aim to provide further explanation and understanding of the methods and results explained in the main text.

In line with the FAIR principles (Findability, Accessibility, Interoperability, and Reusability)<sup>1</sup>, we provide detailed documentation within the two repositories (Section 1 and Section 2) that accompany the article. These repositories are designed to help the reproducibility of our results and facilitate further exploration of the LiF configurations or other Solid Electrolytes Interphase (SEI)<sup>2</sup> compounds, extending the database and improving the ReaxFF force field<sup>3</sup>.

## Contents

|          |                                                                                                                                                           |           |
|----------|-----------------------------------------------------------------------------------------------------------------------------------------------------------|-----------|
| <b>1</b> | <b>Enhancing ReaxFF protocol (Protocol Repository)</b>                                                                                                    | <b>2</b>  |
| 1.1      | Installation . . . . .                                                                                                                                    | 2         |
|          | Minimum Requirements • Requirements for Re-running or Performing New Simulations • Requirements for Re-running ReaxFF optimization • Python project setup |           |
| 1.2      | Folder Structure . . . . .                                                                                                                                | 4         |
| <b>2</b> | <b>Enhancing ReaxFF database (Database Repository)</b>                                                                                                    | <b>6</b>  |
| 2.1      | Installation . . . . .                                                                                                                                    | 9         |
|          | Minimum Requirements • Requirements for Re-running or Performing New Simulations • Python project setup                                                   |           |
| 2.2      | Interacting with the Database . . . . .                                                                                                                   | 9         |
|          | ASE db Command-line • ASE Python Interface • Web Interface                                                                                                |           |
| 2.3      | Folder Structure . . . . .                                                                                                                                | 12        |
| <b>3</b> | <b>DFT simulations</b>                                                                                                                                    | <b>14</b> |
| 3.1      | DFT vs. ReaxFF mechanical deformation . . . . .                                                                                                           | 18        |
| <b>4</b> | <b>Diffusion MSD analysis</b>                                                                                                                             | <b>18</b> |
| <b>5</b> | <b>Reparameterized ReaxFF</b>                                                                                                                             | <b>21</b> |
|          | <b>References</b>                                                                                                                                         | <b>24</b> |

## 1 Enhancing ReaxFF protocol (Protocol Repository)

In this repository, we collect and organize all the steps described in the main text for reparameterizing the ReaxFF potential. To facilitate the interaction with the protocol, we have divided the workflow, illustrated in Figure S1, into four main Jupyter Notebooks (JNBs) and an auxiliary notebook: JNB1-Initial\_configurations.ipynb, JNB2-Simulations.ipynb, JNB3-Build\_trainingset.ipynb, preJNB4-ReaxFF\_optimization.ipynb, JNB4-ReaxFF\_optimization.ipynb. These provided

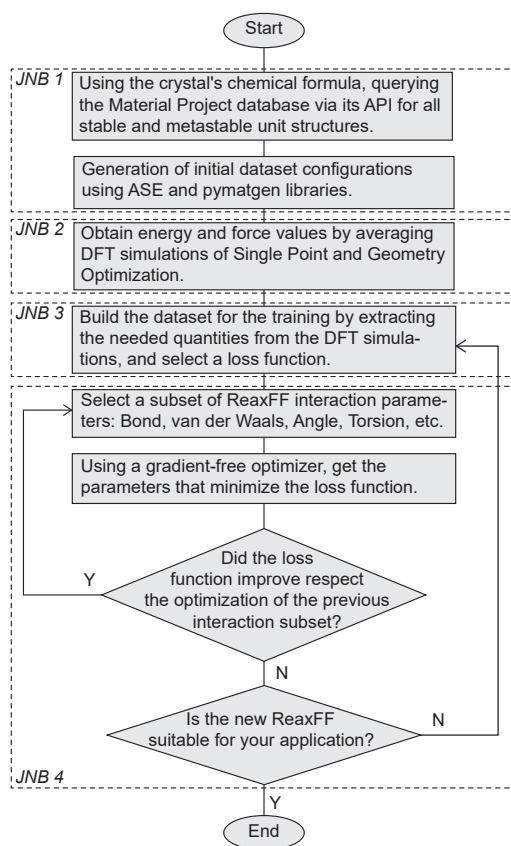

**Figure S1.** Protocol workflow overview

Jupyter Notebooks are specifically designed to streamline the process of configuration building (JNB1), DFT simulation execution (JNB2), database preparation (JNB3), and ReaxFF potential optimization (JNB4), as outlined in the workflow in Figure S1. The conditional part of the workflow is achieved using the fourth and auxiliary notebook since the auxiliary notebook (preJNB4-ReaxFF\_optimization.ipynb) is selected the subset of ReaxFF parameters related to a specific interaction and then fed to the JNB4, which will change it to minimize the loss function.

The repository is available both in Zenodo at the permanent link <https://doi.org/10.5281/zenodo.8036775>, and on version control repositories host GitHub [https://github.com/paolodeangelis/Enhancing\\_ReaxFF](https://github.com/paolodeangelis/Enhancing_ReaxFF), Figure S2.

### 1.1 Installation

The protocol strongly relies on the commercial code Amsterdam Modeling Suite (AMS) by Software for Chemistry & Materials (SCM)<sup>4</sup>. However, depending on which part of the protocol you aim to reproduce, it is possible to install only the minimal requirements, as described in Subsubsection 1.1.1, which allow for the generation and handling of atomistic simulations. To perform the simulations, additional requirements outlined in Subsubsection 1.1.2 are necessary. For the ReaxFF optimization, the Python library ParAMS<sup>5</sup> is indispensable, and it is currently available

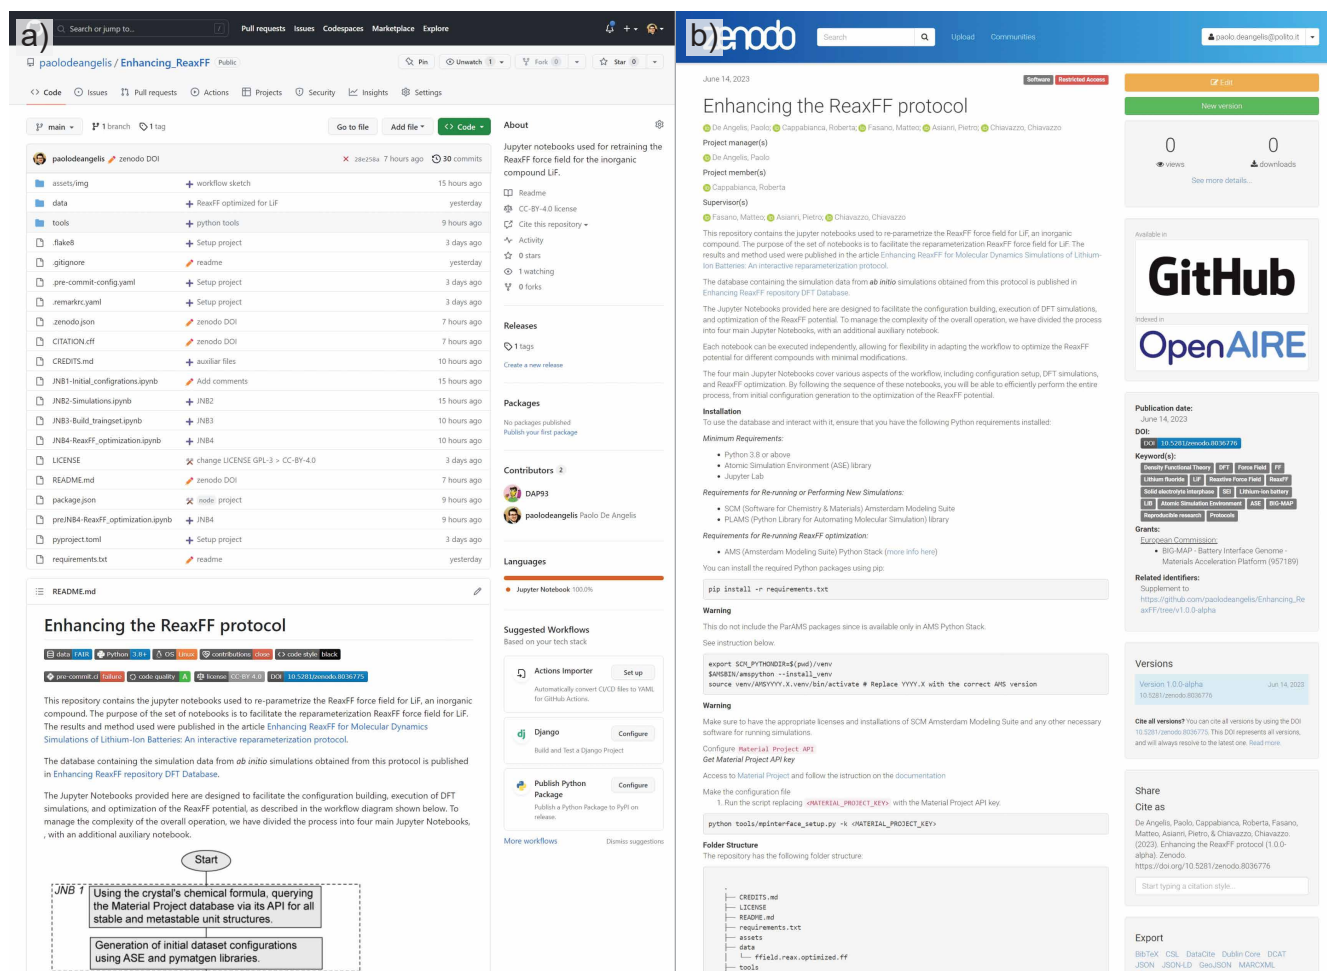

Figure S2. Screenshot of the protocol hosted on GitHub (a) and Zenodo (b).

only within the AMS Python Stack, as explained in Subsubsection 1.1.4.

### 1.1.1 Minimum Requirements

- Python 3.8 or above
- Atomic Simulation Environment (ASE) library
- Jupyter Lab

### 1.1.2 Requirements for Re-running or Performing New Simulations

- SCM (Software for Chemistry & Materials) Amsterdam Modeling Suite
- PLAMS (Python Library for Automating Molecular Simulation) library

### 1.1.3 Requirements for Re-running ReaxFF optimization

- AMS (Amsterdam Modeling Suite) Python Stack ([more info here](#)). To utilize the AMS Python Stack for this project, we recommend creating a Python virtual environment as follow:

```
export SCM_PYTHONDIR=$(pwd)/venv
$AMSBIN/ampython --install_venv
source venv/AMSYYYY.X.venv/bin/activate # Replace YYYY.X with the correct AMS
version
```

### 1.1.4 Python project setup

Regardless of the software available, the next step is to install all the additional Python packages (such as pymatgen, ASE, etc.) required for the protocol. This can be accomplished using the Python package manager, `pip`, through the following terminal command:

```
(venv)$ pip install -r requirements.txt
```

Then it is necessary to set up the Material Project "API keys" to enable the code to query the database. To obtain the API key, follow the instructions provided in the documentation, which can be found [here](#). After obtaining the API key, replace `<MATERIAL_PROJECT_KEY>` with your actual API key and run the script as shown below:

```
(venv)$ python tools/mpinterface_setup.py -k <MATERIAL_PROJECT_KEY>
```

Finally, to utilize the Jupyter Notebooks, it is necessary to run the [Jupyter Lab](#) server using the following command:

```
(venv)$ jupyter lab
```

## 1.2 Folder Structure

The repository is structured as follows:

```
.
├── assets
├── data
│   └── ffield.reax.optimized.ff
├── tools
│   └── ...
├── ...
├── CREDITS.md
├── LICENSE
├── README.md
├── requirements.txt
├── JNB1-Initial_configurations.ipynb
├── JNB2-Simulations.ipynb
├── JNB3-Build_traingset.ipynb
├── preJNB4-ReaxFF_optimization.ipynb
└── JNB4-ReaxFF_optimization.ipynb
```

In the folder tree, we have excluded certain auxiliary files and folders that are not essential for understanding the repository, and below we explain in detail the content of each folder/file:

- `assets`: This folder contains any additional assets, such as images or documentation; related to the repository.
- `data`: This folder contains the data files resulting from this work.
  - `ffield.reax.optimized.ff`: This file is the optimized ReaxFF resulting from using these Jupyter notebooks, as explained in the main text, and as reported in Section 5.

- `tools`: This directory contains a collection of Python modules and scripts.
- `CREDITS.md`: This file acknowledges and credits each author who contributed to the repository.
- `LICENSE`: This file contains the license information for the repository (CC BY 4.0). It specifies the terms and conditions under which the repository's contents are distributed and used.
- `README.md`: This is the "readme" file (repository overview and instructions).
- `requirements.txt`: This file lists the required Python packages and their versions (see Subsection 1.1).
- `JNB1-Initial_configurations.ipynb`: Jupyter Notebook where the protocol is initialized by querying the *Materials Project* database, downloading the unit crystals, and producing all the initial configurations for the DFT simulations using the *pymatgen* library.
- `JNB2-Simulations.ipynb`: This notebook performs the simulations using BAND and DFTB codes available in the Amsterdam Modeling Suite. The simulations are performed in parallel using the *PLAMS* library and *SLURM* scheduler.
- `JNB3-Build_trainingset.ipynb`: Here, the quantities needed for the database are extracted and tuned to favor accuracy on the energy.
- `preJNB4-ReaxFF_optimization.ipynb`: This is an auxiliary Notebook where the old ReaxFF is converted into a Python object, and it is possible to select the subset of coefficients related to specific interactions to change during the optimization (e.g., bond, van der Waals, angular, etc.).
- `JNB4-ReaxFF_optimization.ipynb`: This notebook takes the database and the ReaxFF Python object to perform a multi-objective optimization and find the new ReaxFF potential that minimizes the Sum of Squared Errors (SSE).

## 2 Enhancing ReaxFF database (Database Repository)

In addition to the protocol, we are sharing the complete database used to reparameterize ReaxFF. This allows for testing the optimization without rerunning time-consuming simulations and enables future expansion and improvement by the community. We stored the data using the [ASE SQLite3](#) database, which was chosen for its widespread use in the computational community of European institutions. The use of this type database provides fast and flexible querying and browsing capabilities, as described in Subsection 2.2. The database contains information on initial configurations, single-point calculations, pre-optimizations, and DFT optimizations. However, only a subset of the database is used in the training set for the ReaxFF optimization, as explained in the main text and briefly summarized in Table S1. For each entry in the database, we store various information regarding the simulation and

**Table S1.** Training set composition, with quantities calculated using DFT: Energy (E), Forces (F), and Charges (Q). The numbers in parentheses indicate the successful cases for self-consistent field (SCF) calculations that may not always converge.

| Type         | Unit cell      |            |                | Quantities |   |   |
|--------------|----------------|------------|----------------|------------|---|---|
|              | Fm $\bar{3}$ m | P6 $_3$ mc | Pm $\bar{3}$ m | E          | F | Q |
| Supercells   | 6              | 6          | 6              | ✓          | ✓ | ✓ |
| Vacancies    | 10             | 24         | 10             | ✓          |   | ✓ |
| Strain       | 39             | 39         | 39             | ✓          |   | ✓ |
| Substitution | 5              | 5          | 5              | ✓          |   | ✓ |
| Interstitial | 5              | 5          | 5              | ✓          | ✓ | ✓ |
| Slabs        | 12(10)         | 12(8)      | 12(11)         | ✓          | ✓ | ✓ |
| Bulk 300K    | 10             | 10         | 10             | ✓          |   |   |
| Bulk 500K    | 10             | 10         | 10             | ✓          |   |   |
| Amorphous    | 10             | 10         | 10             | ✓          |   |   |
| Total        | 107(105)       | 121(117)   | 107(106)       |            |   |   |

properties obtained from the DFT calculations. These details are listed in Table S2.

The repository is available both in Zenodo at the permanent link <https://doi.org/10.5281/zenodo.7959121>, and on version control repositories host GitHub [https://github.com/paolodeangelis/Enhancing\\_ReaxFF\\_DFT\\_database](https://github.com/paolodeangelis/Enhancing_ReaxFF_DFT_database), Figure S3.

The screenshot shows the GitHub repository interface. At the top, there's a search bar and navigation links like 'Pull requests', 'Issues', 'Code Spaces', 'Marketplace', and 'Explore'. The repository name 'paolodeangelis/Enhancing\_ReaxFF\_DFT\_database' is displayed. Below this, there are tabs for 'Code', 'Issues', 'Pull requests', 'Actions', 'Projects', 'Security', 'Insights', and 'Settings'. The main content area shows a file tree with folders like 'assets/img', 'data', 'notebooks', 'tools', and 'flake8'. A commit history table is visible, listing recent commits by 'paolodeangelis' and 'pre-commit-ci[bot]'. The 'README.md' file is selected and its content is displayed, including a title, badges for Python 3.9.4, OS Linux, contributors, and code style. The README text describes the database's purpose and provides a table of contents and installation instructions.

The screenshot shows the Zenodo page for the dataset. The title is 'Enhancing the ReaxFF DFT database' and it was created on May 22, 2023. The project manager is listed as 'De Angelis, Paolo'. The page includes a 'Project manager(s)' section, 'Project member(s)', and 'Supervisor(s)'. It features a 'New version' button and statistics showing 20 views and 0 downloads. The 'Available in' section lists 'GitHub' and 'OpenAIRE'. The 'Publication date' is May 22, 2023, and the DOI is '10.5281/zenodo.7959122'. The 'Keywords' section lists 'Energy Molecular Theory', 'DFT', 'Force Field', 'FF', 'Lithium Ion Battery', 'Positive Force Field', 'ReaxFF', 'Solid electrolyte interface', 'SEI', 'Lithium-ion battery', 'Energy simulation', 'Enhancing', 'DFT', 'Big-MAP', 'Interdisciplinary research', and 'Preprints'. The 'Grants' section mentions 'European Commission' and 'Big-MAP - Battery Interface Genome - Materials Acceleration Platform (957189)'. The 'Related identifiers' section provides a link to the GitHub repository. The 'Versions' section shows 'Version 1.0.0-beta' with DOI '10.5281/zenodo.7959122' and a date of 'May 22, 2023'. The 'Cite as version!' section explains that the DOI represents all versions and will always resolve to the latest one. The 'Share' and 'Cite as' sections provide the citation information: 'De Angelis, Paolo, Caspabianca, Roberta, Fasano, Matteo, Asarni, Pietro, & Chivazzo, Chivazzo. (2023). Enhancing the ReaxFF DFT database (1.0.0-beta)'. The 'Folder Structure' section shows a tree view of the repository files.

Figure S3. Screenshot of the database hosted on GitHub (a) and Zenodo (b).

**Table S2.** Detailed list of properties and information store in each database entry

| <b>name</b>  | <b>description</b>                                                                                                                 | <b>type</b> | <b>unit</b>                |
|--------------|------------------------------------------------------------------------------------------------------------------------------------|-------------|----------------------------|
| id           | Unique row ID                                                                                                                      | integer     | –                          |
| ctime        | Creation time of the data (for simulation, it coincides with the runtime)                                                          | float       | yr                         |
| formula      | Chemical formula of the system                                                                                                     | string      | –                          |
| pbcc         | Periodic boundary conditions                                                                                                       | boolean     | –                          |
| user         | Username or full name of the user who created the data                                                                             | string      | –                          |
| calculator   | Name of the ASE-calculator and engine used to calculate the system (e.g. ams/band means AMS calculator with BAND engine)           | string      | –                          |
| energy       | Total energy of the system from the calculation                                                                                    | float       | eV                         |
| natoms       | Number of atoms                                                                                                                    | integer     | –                          |
| fmax         | Maximum force                                                                                                                      | float       | $\text{eV}\text{\AA}^{-1}$ |
| smax         | Maximum stress                                                                                                                     | float       | $\text{eV}/\text{\AA}^3$   |
| charge       | Net charge in unit cell                                                                                                            | float       | e                          |
| mass         | Sum of atomic masses in unit cell                                                                                                  | float       | au                         |
| magmom       | Magnetic moment                                                                                                                    | float       | $\mu_B$                    |
| unique_id    | Random (unique) ID                                                                                                                 | integer     | –                          |
| volume       | Volume of unit cell                                                                                                                | float       | $\text{\AA}^3$             |
| functional   | Exchange-and-correlation functional                                                                                                | string      | –                          |
| fermi_energy | Fermi Energy (N.B. is not the Fermi Level), which indicates the energy of non-interacting fermions in the system (Fermi gas) at 0K | float       | eV                         |
| homo_energy  | Highest Occupied Molecular Orbital energy                                                                                          | float       | eV                         |
| lumo_energy  | Lowest Unoccupied Molecular Orbital energy                                                                                         | float       | eV                         |
| band_gap     | Band gap energy (for LiF is the HOMO energy - LUMO energy)                                                                         | float       | eV                         |
| runtime      | Simulation start date with format %b%d-%Y %H:%M:%S                                                                                 | string      | –                          |
| elapsed      | Elapsed Time                                                                                                                       | float       | s                          |
| name         | System Name                                                                                                                        | string      | –                          |
| sim_name     | Simulation Name                                                                                                                    | string      | –                          |
| subset_name  | Name of the subset of configuration                                                                                                | string      | –                          |
| run_script   | Full AMS scrip for running the simulation                                                                                          | string      | –                          |
| input_script | Full input scrip for running the simulation                                                                                        | string      | –                          |
| success      | Simulation end status                                                                                                              | boolean     | –                          |
| used_in      | Indicate in which set (training-set or test-set) the data was used                                                                 | string      | –                          |
| task         | Simulation task type                                                                                                               | string      | –                          |
| space_group  | Full International Space Group Symbol. The notation is a LaTeX-like string, with screw axes being represented by an underscore     | string      | –                          |
| data         | Additional data calculate: Density of states(DOS) and Hystroy (e.g. energy, force evolution during the simulation)                 | dictionary  | –                          |



## 2.1 Installation

To browse and query the database, only Python and the ASE and Jupyter Lab libraries are required (see Subsubsection 2.1.1). With this minimal setup, it is possible to perform additional simulations using the preferred DFT engine. Using ASE, you can wrap the simulations and add them to the database. For an example, you can refer to the `notebooks\running_simulation.ipynb` Jupyter Notebook, which demonstrates the usage of the BAND plane-wave DFT code. However, if you wish to rerun the simulations stored in the database, the commercial code Amsterdam Modeling Suite (AMS) is required (refer to Subsubsection 2.1.2).

### 2.1.1 Minimum Requirements

- Python 3.8 or above
- Atomic Simulation Environment (ASE) library
- Jupyter Lab

### 2.1.2 Requirements for Re-running or Performing New Simulations

- SCM (Software for Chemistry & Materials) Amsterdam Modeling Suite
- PLAMS (Python Library for Automating Molecular Simulation) library

### 2.1.3 Python project setup

Similar to the protocol repository, the project setup requires the installation of additional Python packages such as ASE, PLAMS, etc. These packages can be installed using the Python package manager, `pip`, with the following terminal command:

```
(venv)$ pip install -r requirements.txt
```

Then it is possible to utilize the Jupyter Notebooks by starting the [Jupyter Lab](#) server using the following command:

```
(venv)$ jupyter lab
```

## 2.2 Interacting with the Database

There are three methods available for interacting with the database: using the ASE db command line, the web interface, and the ASE Python interface.

### 2.2.1 ASE db Command-line

To interact with the database through the ASE db command line, follow these steps:

1. Open a terminal and navigate to the directory where the `LiF.db` file is located.
2. Execute the following command to initiate the ASE db terminal:

```
(venv)$ ase db LiF.db
```

3. Now, one can utilize the available commands within the terminal to query and manipulate the database.

```
(venv) paolo@DESKTOP-G01UGMT:~/PyProjects/Enhancing_ReaxFF_DFT_database/data$ ase db LiF.db -L 8
id|age|user          |formula|calculator| energy|natoms| fmax|pbc|volume|charge| mass| smax
1|18M|Paolo De Angelis|LiF      |          |      | 2|   |TTT|17.022| 0.000|25.938|
2|18M|Paolo De Angelis|LiF      |ams/band  |-9.623| 2|0.000|TTT|17.022| 0.000|25.938|0.012
3|18M|Paolo De Angelis|Li2F2   |          |      | 4|   |TTT|42.224| 0.000|51.877|
4|18M|Paolo De Angelis|Li2F2   |ams/band  |-19.209| 4|0.039|TTT|42.224| 0.000|51.877|0.007
5|18M|Paolo De Angelis|LiF      |          |      | 2|   |TTT|16.768| 0.000|25.938|
6|18M|Paolo De Angelis|LiF      |ams/band  |-9.024| 2|0.000|TTT|16.768| 0.000|25.938|0.008
7|18M|Paolo De Angelis|LiF      |ams/band  |-9.626| 2|0.000|TTT|16.499| 0.000|25.938|0.001
8|18M|Paolo De Angelis|Li2F2   |ams/band  |-19.214| 4|0.007|TTT|41.420| 0.000|51.877|0.001
Rows: 706 (showing first 8)
Keys: band_gap, elapsed, fermi_energy, functional, homo_energy, input_script, lumo_energy, name, run_script, runtime, sim_name, space_group, subset_name, success, task, used_in
(venv) paolo@DESKTOP-G01UGMT:~/PyProjects/Enhancing_ReaxFF_DFT_database/data$ ase db LiF.db id=2 -l
LiF:
Unit cell in Ang:
axis|periodic|      x|      y|      z| length| angle
1|  yes|  2.501|  0.000|  1.444|  2.887| 60.000
2|  yes|  0.834|  2.358|  1.444|  2.887| 60.000
3|  yes|  0.000|  0.000|  2.887|  2.887| 60.000
```

Figure S4. Example of interacting with the database via the terminal.

## 2.2.2 ASE Python Interface

To interact with the database using the ASE Python interface, you can utilize the following code example:

```
from ase.db import connect

# Connect to the database
db = connect("LiF.db")

# Query the database
results = db.select('success=True')

# Iterate over the results
for row in results:
    print(f"ID: {row.id}, Energy: {row.energy}")
```

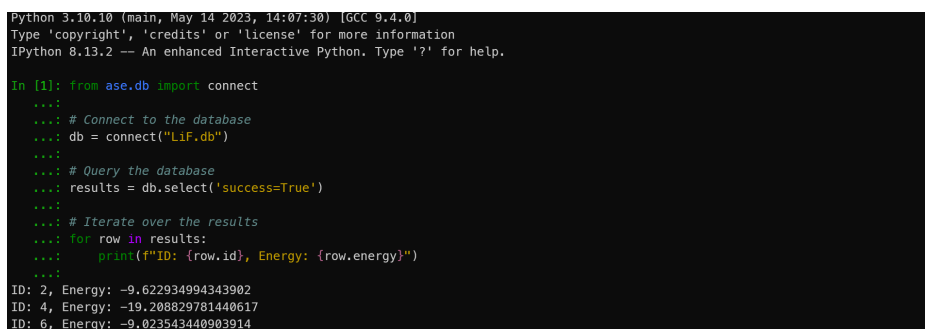

```
Python 3.10.10 (main, May 14 2023, 14:07:30) [GCC 9.4.0]
Type 'copyright', 'credits' or 'license' for more information
IPython 8.13.2 -- An enhanced Interactive Python. Type '?' for help.

In [1]: from ase.db import connect
...:
...: # Connect to the database
...: db = connect("LiF.db")
...:
...: # Query the database
...: results = db.select('success=True')
...:
...: # Iterate over the results
...: for row in results:
...:     print(f"ID: {row.id}, Energy: {row.energy}")
...:
ID: 2, Energy: -9.622934994343902
ID: 4, Energy: -19.208829781440617
ID: 6, Energy: -9.023543440903914
```

**Figure S5.** Example of interacting with the database via Python, utilizing the iPython terminal interface.

For a more detailed example, refer to the notebook `notebooks\browsing_db.ipynb`. To learn how to perform a simulation, check the notebook `notebooks\running_simulation.ipynb`.

## 2.2.3 Web Interface

To interact with the database using the web interface, follow these steps:

1. Open a terminal and navigate to the directory where the `LiF.db` file is located.
2. Execute the following command to initiate the ASE db terminal:

```
(venv) $ ase db -w LiF.db
```

3. Access the web browser and connect to the local server at <http://127.0.0.1:5000>.
4. Upon accessing the interface, Figure S6.a will be displayed, showcasing all the entries in the database.
5. To query the database and filter the entries based on specific criteria, users can input their search parameters into the designated fields (e.g. `success=True`).
6. Once the query is executed, Figure S6.b will be displayed, presenting the selected entries that match the search criteria.
7. To access all the information of an individual entry, users can click on a specific entry to view a detailed visualization. Figure S7 demonstrates an example of a single entry displayed through the web interface.

a)

LiF Dataset for ReaxFF parametrization

Search formula e.g. MoS2

Help with constructing advanced search queries ...

Toggle list of keys ...

Displaying rows 1-25 out of 706

| ID | Age | Formula | System Name       | Calculator | PBC | Task                  | Maximum force | Volume | Charge | Energy  | Simulation status | Elapsed Time | Subset Name             | Used in  |
|----|-----|---------|-------------------|------------|-----|-----------------------|---------------|--------|--------|---------|-------------------|--------------|-------------------------|----------|
| 1  | 18M | LiF     | 0-LiF_Fm-3m_3-18  | -          | TTT | initial configuration | -             | 17.022 | 0.000  | -       | -                 | -            | unit cell               | none     |
| 2  | 18M | LiF     | 0-LiF_Fm-3m_3-18  | ams/band   | TTT | single point          | 0.000         | 17.022 | 0.000  | -9.623  | True              | 518.069      | unit cell               | none     |
| 3  | 18M | L2F2    | 1-LiF_P6_3mc_3-17 | -          | TTT | initial configuration | -             | 42.224 | 0.000  | -       | -                 | -            | unit cell               | none     |
| 4  | 18M | L2F2    | 1-LiF_P6_3mc_3-17 | ams/band   | TTT | single point          | 0.039         | 42.224 | 0.000  | -19.209 | True              | 547.002      | unit cell               | none     |
| 5  | 18M | LiF     | 2-LiF_Pm-3m_2-89  | -          | TTT | initial configuration | -             | 16.768 | 0.000  | -       | -                 | -            | unit cell               | none     |
| 6  | 18M | LiF     | 2-LiF_Pm-3m_2-89  | ams/band   | TTT | single point          | 0.000         | 16.768 | 0.000  | -9.024  | True              | 447.538      | unit cell               | none     |
| 7  | 18M | LiF     | 0-LiF_Fm-3m_3-18  | ams/band   | TTT | geometry optimization | 0.000         | 16.499 | 0.000  | -9.626  | True              | 1126.407     | unit cell               | training |
| 8  | 18M | L2F2    | 1-LiF_P6_3mc_3-17 | ams/band   | TTT | geometry optimization | 0.007         | 41.420 | 0.000  | -19.214 | True              | 1025.345     | unit cell               | test     |
| 9  | 18M | LiF     | 2-LiF_Pm-3m_2-89  | ams/band   | TTT | geometry optimization | 0.000         | 16.533 | 0.000  | -9.024  | True              | 745.817      | unit cell               | test     |
| 10 | 17M | F4      | 0-F_C2c_n4        | -          | TTT | initial configuration | -             | 76.301 | 0.000  | -       | -                 | -            | pure elements unit cell | none     |
| 11 | 17M | F4      | 0-F_C2c_n4        | ams/band   | TTT | single point          | 1.271         | 76.301 | 0.000  | -7.120  | True              | 60.805       | pure elements unit cell | training |
| 12 | 17M | L3      | 1-Li_R-3m_n3      | ams/band   | TTT | single point          | 0.008         | 60.335 | 0.000  | -5.470  | True              | 132.487      | pure elements unit cell | training |
| 13 | 17M | L3      | 1-Li_R-3m_n3      | ams/band   | TTT | single point          | 0.008         | 60.335 | 0.000  | -5.470  | True              | 132.487      | pure elements unit cell | training |
| 14 | 17M | F4      | 0-F_C2c_n4        | ams/band   | TTT | geometry optimization | -             | 96.959 | 0.000  | -7.182  | True              | 1706.927     | pure elements unit cell | none     |
| 15 | 11M | L3      | 1-Li_R-3m_n3      | ams/band   | TTT | geometry optimization | -             | 63.800 | 0.000  | -5.477  | True              | 3780.882     | pure elements unit cell | none     |
| 16 | 18M | L2F2    | 1-LiF_P6_3mc_3-17 | ams/band   | TTT | single point          | 0.000         | 34.044 | 0.000  | -19.251 | True              | 350.506      | supercell               | training |

b)

LiF Dataset for ReaxFF parametrization

success=True

Help with constructing advanced search queries ...

Toggle list of keys ...

Displaying rows 1-25 out of 377 (direct link)

| ID | Age | Formula | System Name       | Calculator | PBC | Task                  | Maximum force | Volume | Charge | Energy  | Simulation status | Elapsed Time | Subset Name             | Used in  |
|----|-----|---------|-------------------|------------|-----|-----------------------|---------------|--------|--------|---------|-------------------|--------------|-------------------------|----------|
| 2  | 18M | LiF     | 0-LiF_Fm-3m_3-18  | ams/band   | TTT | single point          | 0.000         | 17.022 | 0.000  | -9.623  | True              | 518.069      | unit cell               | none     |
| 4  | 18M | L2F2    | 1-LiF_P6_3mc_3-17 | ams/band   | TTT | single point          | 0.039         | 42.224 | 0.000  | -19.209 | True              | 547.002      | unit cell               | none     |
| 6  | 18M | LiF     | 2-LiF_Pm-3m_2-89  | ams/band   | TTT | single point          | 0.000         | 16.768 | 0.000  | -9.024  | True              | 447.538      | unit cell               | none     |
| 7  | 18M | LiF     | 0-LiF_Fm-3m_3-18  | ams/band   | TTT | geometry optimization | 0.000         | 16.499 | 0.000  | -9.626  | True              | 1126.407     | unit cell               | training |
| 8  | 18M | L2F2    | 1-LiF_P6_3mc_3-17 | ams/band   | TTT | geometry optimization | 0.007         | 41.420 | 0.000  | -19.214 | True              | 1025.345     | unit cell               | test     |
| 9  | 18M | LiF     | 2-LiF_Pm-3m_2-89  | ams/band   | TTT | geometry optimization | 0.000         | 16.533 | 0.000  | -9.024  | True              | 745.817      | unit cell               | test     |
| 11 | 17M | F4      | 0-F_C2c_n4        | ams/band   | TTT | single point          | 1.271         | 76.301 | 0.000  | -7.120  | True              | 60.805       | pure elements unit cell | training |
| 13 | 17M | L3      | 1-Li_R-3m_n3      | ams/band   | TTT | single point          | 0.008         | 60.335 | 0.000  | -5.470  | True              | 132.487      | pure elements unit cell | training |
| 14 | 17M | F4      | 0-F_C2c_n4        | ams/band   | TTT | geometry optimization | -             | 96.959 | 0.000  | -7.182  | True              | 1706.927     | pure elements unit cell | none     |
| 15 | 11M | L3      | 1-Li_R-3m_n3      | ams/band   | TTT | geometry optimization | -             | 63.800 | 0.000  | -5.477  | True              | 3780.882     | pure elements unit cell | none     |
| 17 | 18M | L2F2    | 1-LiF_P6_3mc_3-17 | ams/band   | TTT | single point          | 0.000         | 34.044 | 0.000  | -19.251 | True              | 350.506      | supercell               | training |

Figure S6. Screenshot showing the web interface of the database, displaying all the entries (a), and filtering the entries after querying the database (b).

Back to search page

FLi

Structure

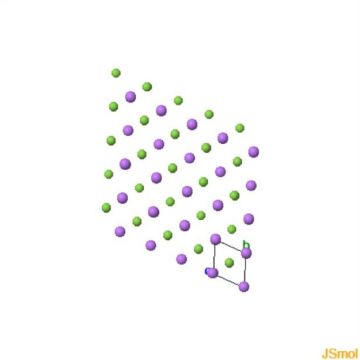

Open ASE's GUI

Download Unit cell

| Axis | x     | y     | z     | Periodic |
|------|-------|-------|-------|----------|
| 1    | 2.501 | 0.000 | 1.444 | True     |
| 2    | 0.834 | 2.358 | 1.444 | True     |
| 3    | 0.000 | 0.000 | 2.887 | True     |

Lengths: 2.887 2.887 2.887

Angles: 60.000 60.000 60.000

Keys and values

| Key      | Description     | Value               |
|----------|-----------------|---------------------|
| task     | Simulation Task | single point        |
| sim_name | Simulation Name | SP-0-LiF_Fm-3m_3-18 |
| band_gap | Band gap energy | 8.757 eV            |

Figure S7. Screenshot displaying a entrie from the database visualized using the web interface.

## 2.3 Folder Structure

The repository is structured as follows:

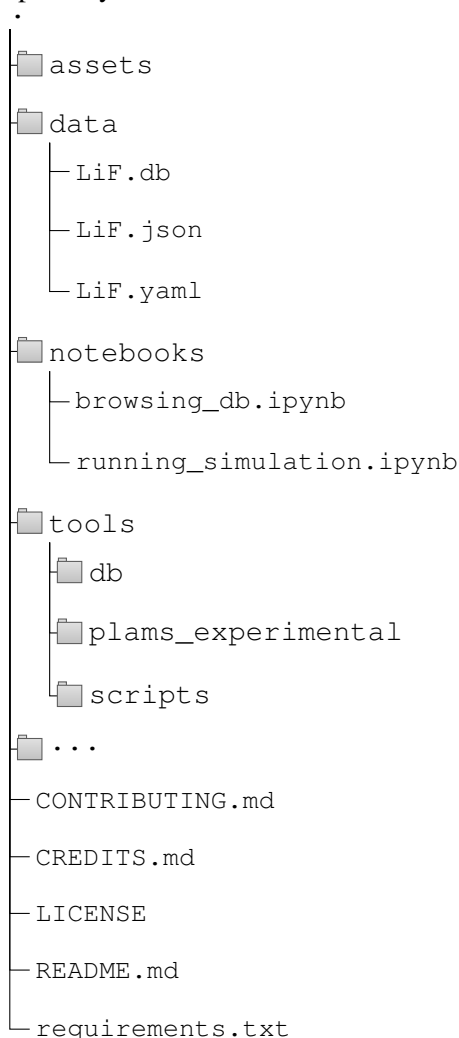

- **assets:** This folder contains any additional assets, such as images or documentation, related to the repository.
- **data:** This folder contains the data files used in the repository.
  - **LiF.db:** This file is the SQLite database file that includes the DFT data used for the ReaxFF force field. Specifically, it contains data related to the inorganic compound LiF.
  - **LiF.json:** This file provides the database metadata in a human-readable format JSON.
  - **LiF.yaml:** This file also contains the database metadata in a more human-readable format YAML.
- **notebooks:** This folder contains Jupyter notebooks that provide demonstrations and examples of how to use and analyze the database.
  - **browsing\_db.ipynb:** This notebook demonstrates how to handle, select, read, and understand the data points in the `LiF.db` database using the ASE database Python interface. It serves as a guide for exploring and navigating the database effectively.

- `running_simulation.ipynb`: In this notebook, you will find an example of how to get a data point from the `LiF.db` database and use it to perform a new simulation. The notebook showcases how to utilize either the [PLAMS](#) library or the [AMSCalculator](#) and ASE Python library to conduct simulations based on the retrieved data and then store it as a new data point in the `LiF.db` database. It provides step-by-step instructions and code snippets for a seamless simulation workflow.
- `tools`: This directory contains a collection of Python modules and scripts that are useful for reading, analyzing, and re-running simulations stored in the database. These tools are indispensable for ensuring that this repository adheres to the principles of Interoperability and Reusability, as outlined by the [FAIR principles](#).
  - `db`: This Python module provides functionalities for handling, reading, and storing data into the database.
  - `plasm_experimental`: This Python module includes the necessary components for using the `AMSCalculator` with `PLASM` and the `SCM` software package, utilizing the ASE API. It facilitates running simulations, and performing calculations.
  - `scripts`: This directory contains additional scripts for advanced usage scenarios of this repository.
- `CONTRIBUTING.md`: This file provides guidelines and instructions for contributing to the repository. It outlines the contribution process, coding conventions, and other relevant information for potential contributors.
- `CREDITS.md`: This file acknowledges and credits each author who contributed to the repository.
- `LICENSE`: This file contains the license information for the repository (CC BY 4.0). It specifies the terms and conditions under which the repository's contents are distributed and used.
- `README.md`: This is the “readme” file (repository overview and instructions).
- `requirements.txt`: This file lists the required Python packages and their versions. (see Subsection [2.1](#))

### 3 DFT simulations

In this section, we present the results of our DFT simulations, highlighting the energy obtained for various configurations.

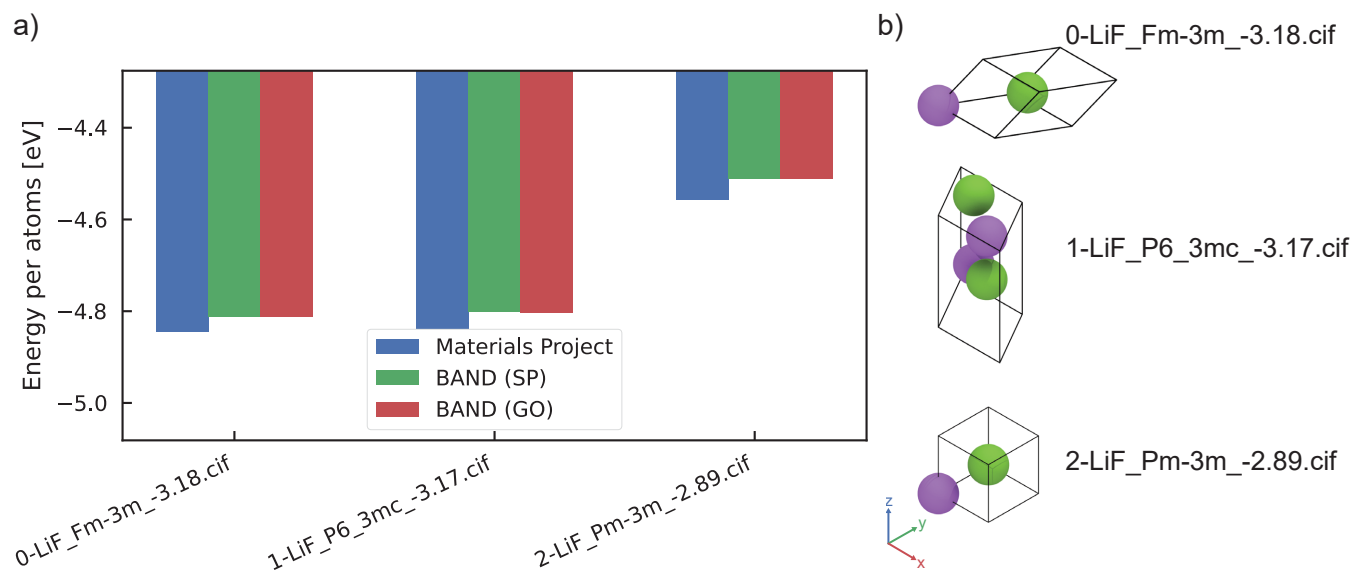

**Figure S8.** Comparison of energy per atom obtained from DFT simulations (SP: Single Point, GO: Geometry Optimization) with those stored on Material Project (a), for each primitive unit cell of LiF (b).

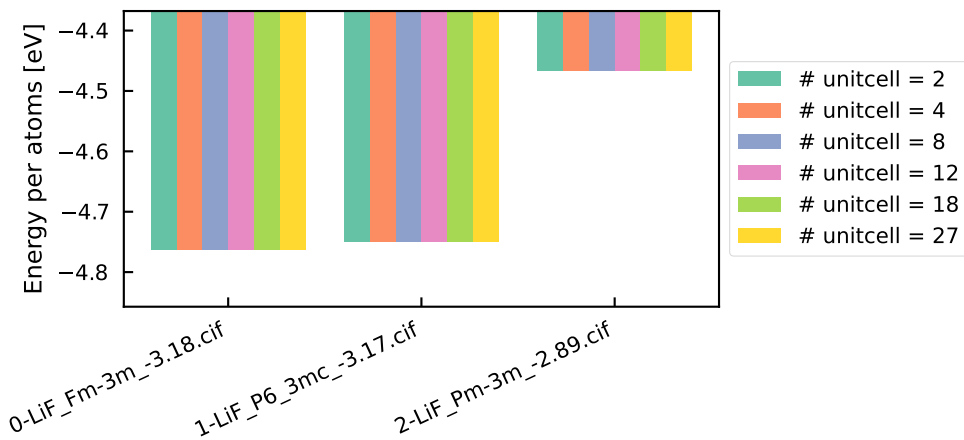

**Figure S9.** Energy per atom obtained from DFT simulations for each crystal in the LiF supercell.



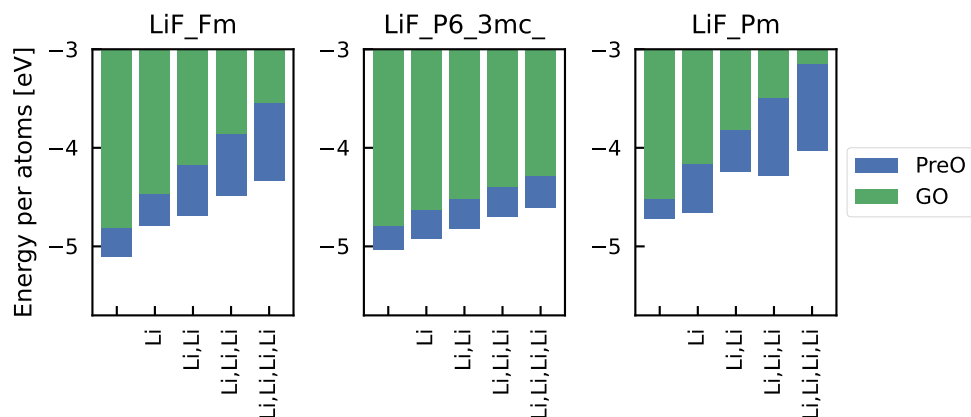

**Figure S13.** Energy per atom obtained from DFT simulations for each system with an added interstitial defect. Due to the significant crystal deformation introduced, the optimization process was conducted in two steps: Pre-optimization (blue) and full geometry optimization (green).

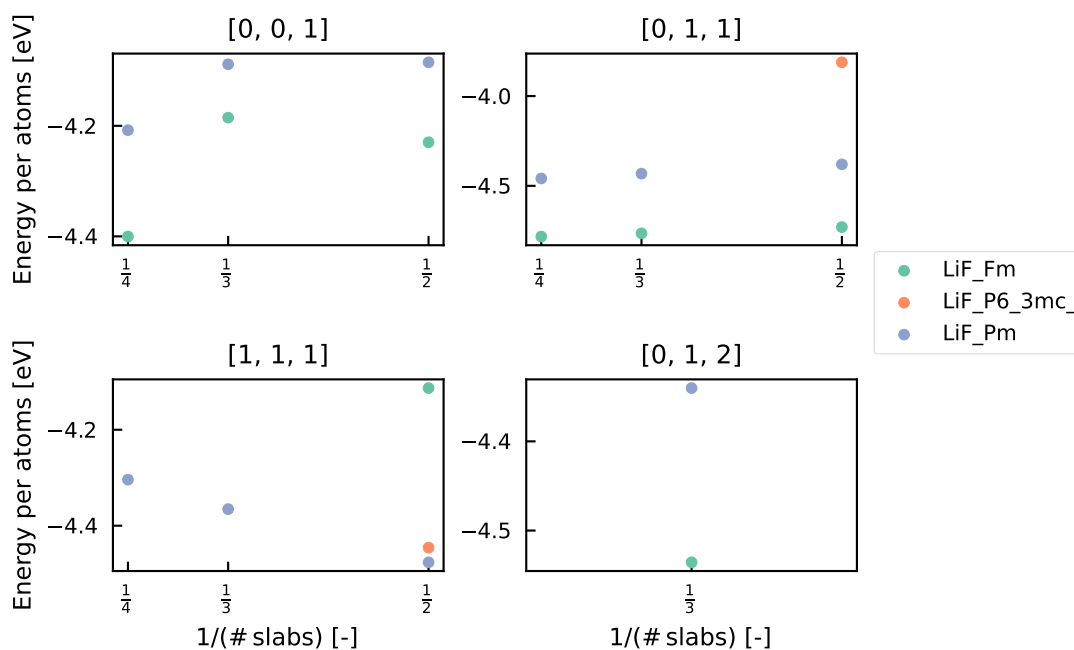

**Figure S14.** Comparing energy per atom for different crystal plates ( $[0, 0, 1]$ ,  $[0, 1, 1]$ ,  $[1, 1, 1]$ ,  $[0, 1, 2]$ ) with varying slab thickness. The plot illustrates how the energy per atom changes as a function of the inverse of the number of slabs, emphasizing the impact of surface energy.



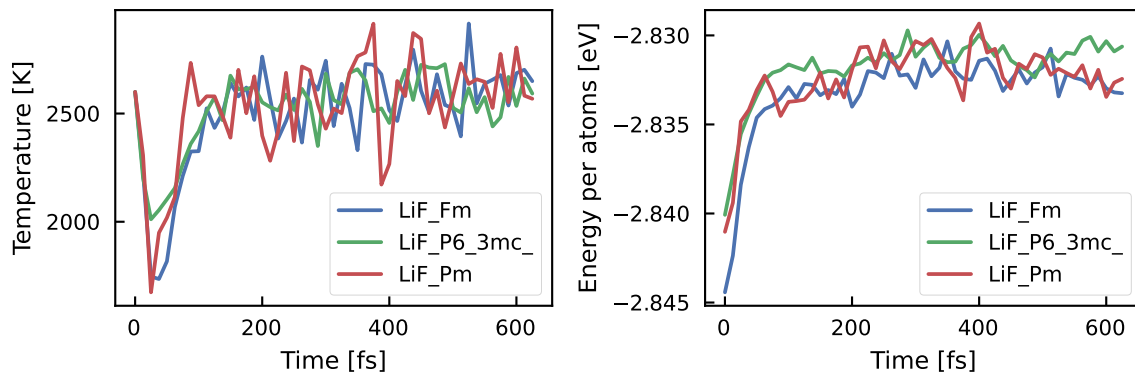

**Figure S15.** Evolution of temperature and energy per atom in *ab initio* NVT-MD simulation at 2500 K with Non-Scc-GFN1xTB DFTB model<sup>6</sup> for sampling amorphous LiF systems.

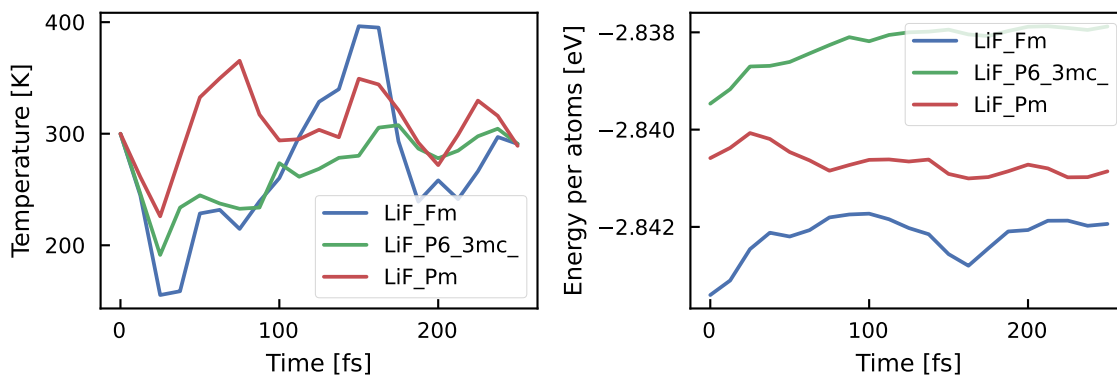

**Figure S16.** Evolution of temperature and energy per atom in *ab initio* NVT-MD simulation at 300 K with Non-Scc-GFN1xTB DFTB model<sup>6</sup> for sampling solid LiF systems.

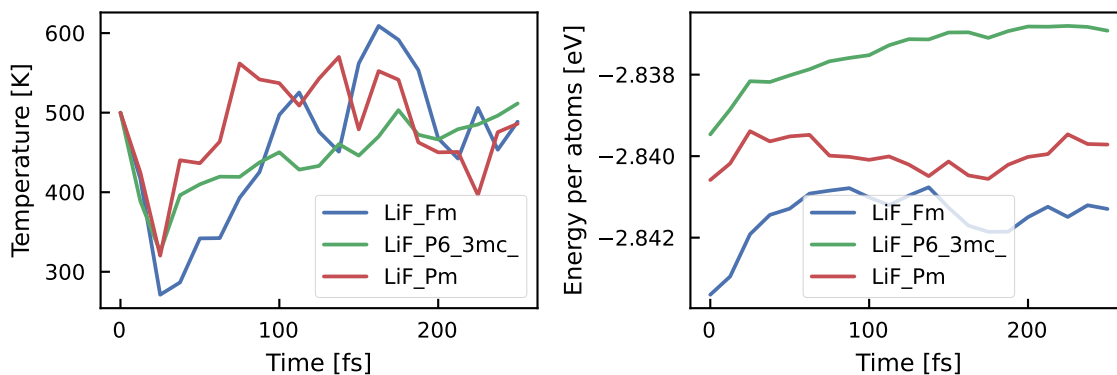

**Figure S17.** Evolution of temperature and energy per atom in *ab initio* NVT-MD simulation at 500 K with Non-Scc-GFN1xTB DFTB model<sup>6</sup> for sampling solid LiF systems.

### 3.1 DFT vs. ReaxFF mechanical deformation

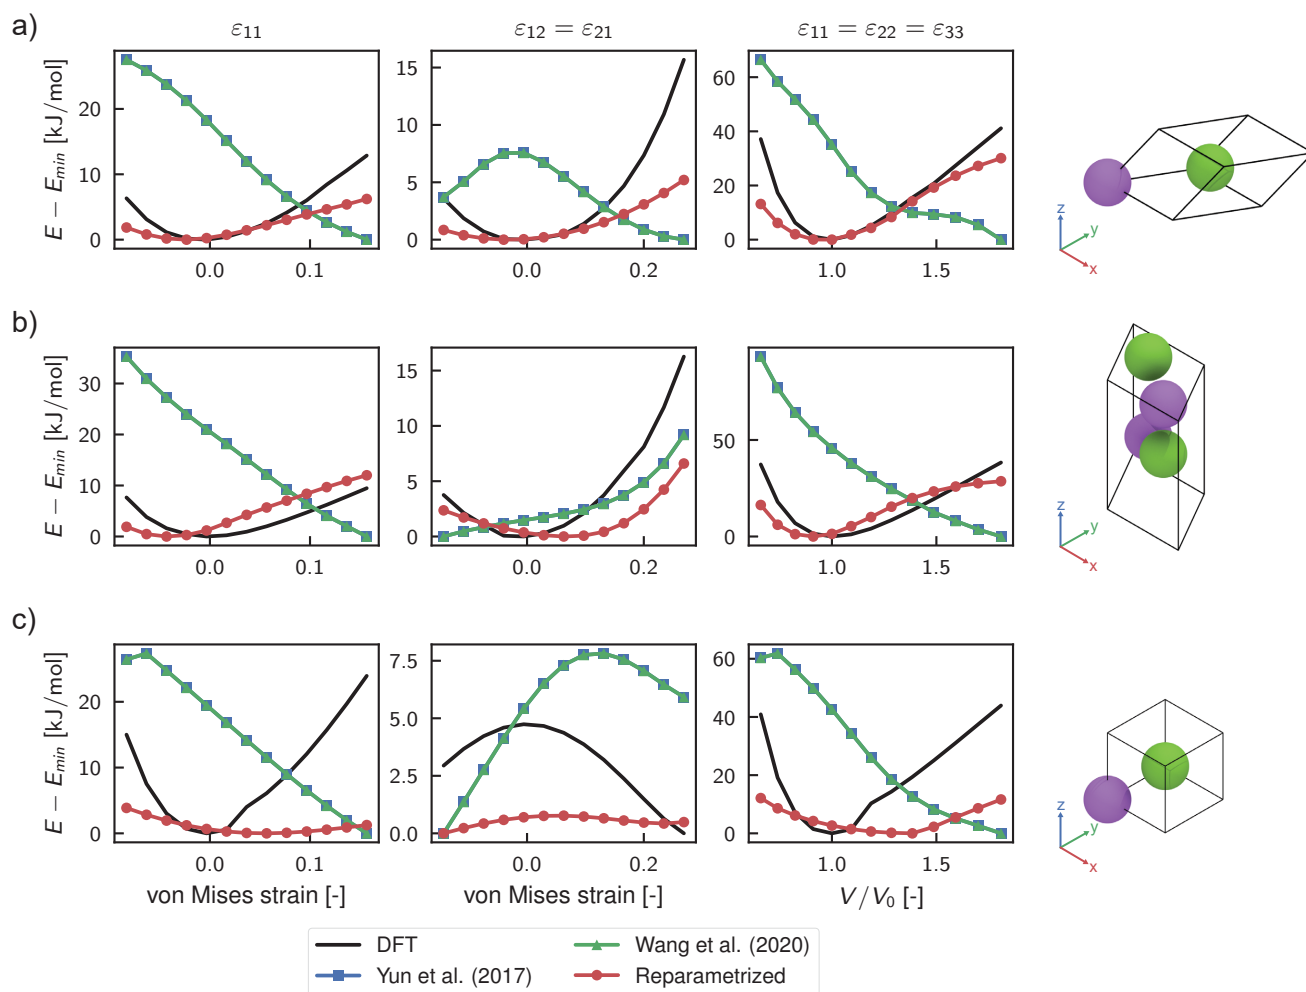

**Figure S18.** Comparing the mechanical response of LiF: ReaxFF and DFT Predictions. The black line represents DFT results used for training, while the blue, green, and red lines depict the energy predictions by ReaxFF models from Yun et al.<sup>7</sup>, Wang et al.<sup>8</sup>, and our proposed new reparameterization, respectively. We examine the energy variation with respect to the equilibrium crystal for three types of deformation: tensile strain deformation  $\epsilon_{11}$  (left), shear strain deformation  $\epsilon_{12} = \epsilon_{21}$  (center), and homogeneous lattice length change  $V/V_0$  (where  $V_0$  is the equilibrium volume). This study was performed on all stable and metastable crystals with space groups  $Fm\bar{3}m$  (a),  $Pm\bar{3}m$  (b), and  $P6_3mc$  (c) from the Material Project database<sup>9</sup>.

## 4 Diffusion MSD analysis

Presented here is a plot illustrating the Mean Square Displacement (MSD) analysis conducted to investigate Li diffusion using ReaxFF simulations.

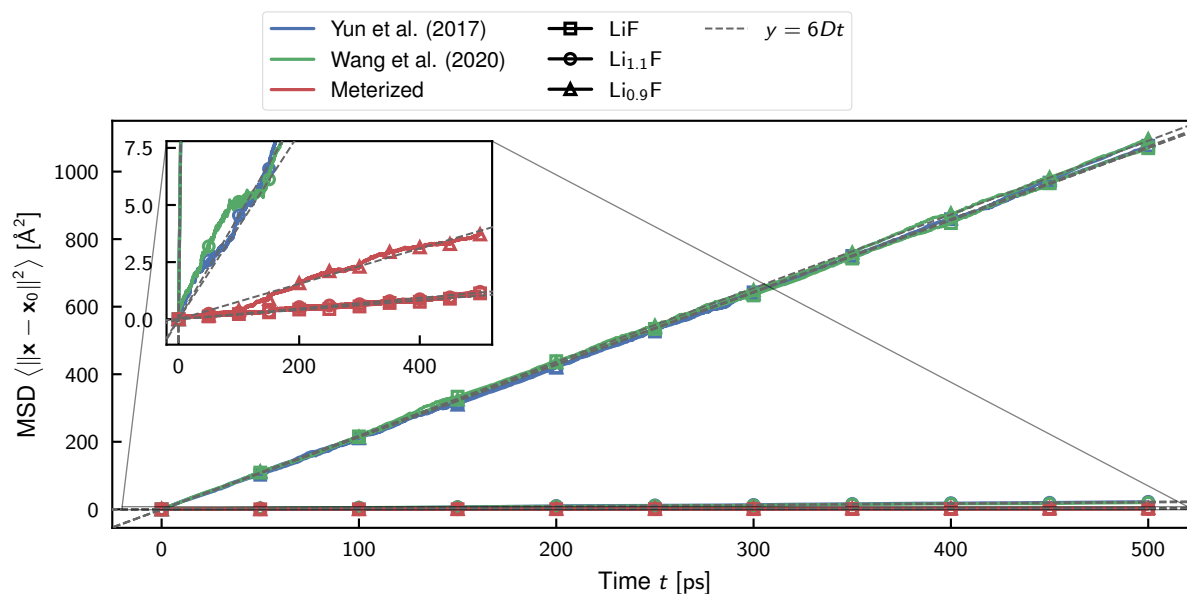

**Figure S19.** Evolution of Mean Square Displacement (MSD) during NVT-MD ReaxFF simulations of Pure Bulk LiF (LiF) and point defects: vacancy ( $Li_{0.9}F$ ) and interstitial ( $Li_{1.1}F$ ) at 300K. The markers (square, circle, and triangular) represent the corresponding systems in the plot. The simulations were performed using ReaxFF parameterizations by Yun et al.<sup>7</sup> (blue), Wang et al.<sup>8</sup> (green), and our proposed new parameterization (red). The dashed line indicates the linear model ( $MSD = 6D \cdot t$ ) employed to compute diffusivity in each simulation.

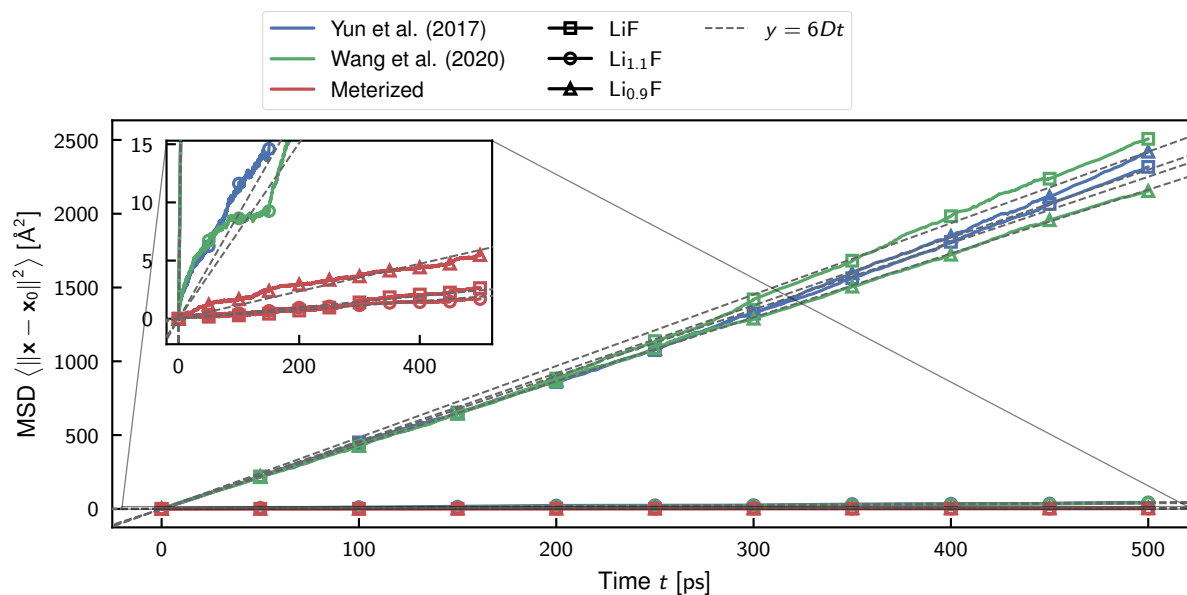

**Figure S20.** Evolution of Mean Square Displacement (MSD) during NVT-MD ReaxFF simulations of Pure Bulk LiF (LiF) and point defects: vacancy ( $Li_{0.9}F$ ) and interstitial ( $Li_{1.1}F$ ) at 400K. The markers (square, circle, and triangular) represent the corresponding systems in the plot. The simulations were performed using ReaxFF parameterizations by Yun et al.<sup>7</sup> (blue), Wang et al.<sup>8</sup> (green), and our proposed new parameterization (red). The dashed line indicates the linear model ( $MSD = 6D \cdot t$ ) employed to compute diffusivity in each simulation.

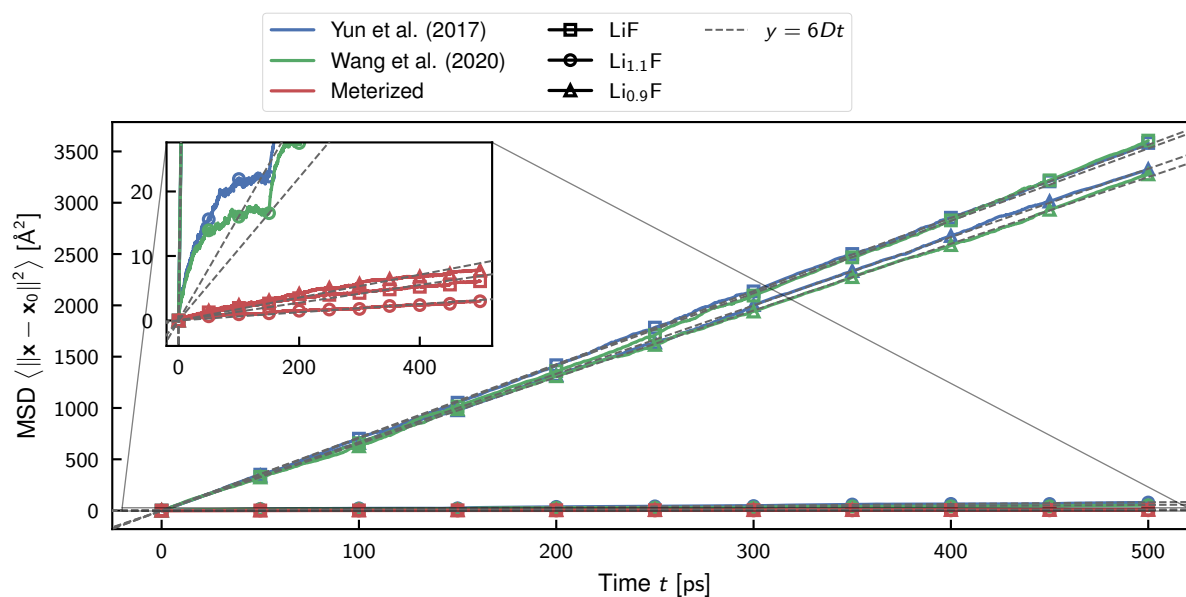

**Figure S21.** Evolution of Mean Square Displacement (MSD) during NVT-MD ReaxFF simulations of Pure Bulk LiF (LiF) and point defects: vacancy (Li<sub>0.9</sub>F) and interstitial (Li<sub>1.1</sub>F) at 500K. The markers (square, circle, and triangular) represent the corresponding systems in the plot. The simulations were performed using ReaxFF parameterizations by Yun et al.<sup>7</sup> (blue), Wang et al.<sup>8</sup> (green), and our proposed new parameterization (red). The dashed line indicates the linear model ( $MSD = 6D \cdot t$ ) employed to compute diffusivity in each simulation.

## 5 Reparameterized ReaxFF

```
1 ! ReaxFF force field C/H/O/Si/Li/F by P. De Angelis (reparameterized from ReaxFF by Yun,
   ! Kang-Seop, et al. (2017).).
2 39      ! Number of general parameters
3 50.0000 !Overcoordination parameter
4 9.5469  !Overcoordination parameter
5 26.5405 !Valency angle conjugation parameter
6 1.7224  !Triple bond stabilisation parameter
7 6.8702  !Triple bond stabilisation parameter
8 60.4850 !C2-correction
9 1.0588  !Undercoordination parameter
10 4.6000 !Triple bond stabilisation parameter
11 12.1176 !Undercoordination parameter
12 13.3056 !Undercoordination parameter
13 -70.5044 !Triple bond stabilization energy
14 0.0000 !Lower Taper-radius
15 10.0000 !Upper Taper-radius
16 2.8793 !Not used
17 33.8667 !Valency undercoordination
18 6.0891 !Valency angle/lone pair parameter
19 1.0563 !Valency angle
20 2.0384 !Valency angle parameter
21 6.1431 !Not used
22 6.9290 !Double bond/angle parameter
23 0.3989 !Double bond/angle parameter: overcoord
24 3.9954 !Double bond/angle parameter: overcoord
25 -2.4837 !Not used
26 5.7796 !Torsion/BO parameter
27 10.0000 !Torsion overcoordination
28 1.9487 !Torsion overcoordination
29 -1.2327 !Conjugation 0 (not used)
30 2.1645 !Conjugation
31 1.5591 !vdWaals shielding
32 0.0010 !Cutoff for bond order (*100)
33 2.1365 !Valency angle conjugation parameter
34 0.6991 !Overcoordination parameter
35 50.0000 !Overcoordination parameter
36 1.8512 !Valency/lone pair parameter
37 0.5000 !Not used
38 20.0000 !Not used
39 5.0000 !Molecular energy (not used)
40 0.0000 !Molecular energy (not used)
41 2.6962 !Valency angle conjugation parameter
42 6      ! Nr of atoms; cov.r; valency; a.m.; Rvdw; Evdw; gammaEEM; cov.r2; #el.
43      ! alfa; gammavdW; valencyl3; Eunder; Eover; chiEEM; etaEEM; n.u1
44      ! cov.r3; Elp; Heat inc.; l3BO1; l3BO2; l3BO3; n.u2; n.u3
45      ! ov/un; vval1; vval2; vval3; vval4; n.u5; n.u6; n.u7
46 C    1.3825  4.0000  12.0000  1.9133  0.1853  0.9000  1.1359  4.0000
47      9.7602  2.1346  4.0000  33.2433  79.5548  5.8678  7.0000  0.0000
48      1.2104  0.0000  199.0303  8.6991  34.7289  13.3894  0.8563  0.0000
49      -2.8983  2.5000  1.0564  4.0000  2.9663  0.0000  0.0000  0.0000
50 H    0.7853  1.0000  1.0080  1.5904  0.0419  1.0206  -0.1000  1.0000
51      9.3557  5.0518  1.0000  0.0000  121.1250  5.3200  7.4366  1.0000
52      -0.1000  0.0000  62.4879  1.9771  3.3517  0.7571  1.0698  0.0000
53      -15.7683  2.1488  1.0338  1.0000  2.8793  0.0000  0.0000  0.0000
54 O    1.2450  2.0000  15.9990  2.3890  0.1000  1.0898  1.0548  6.0000
55      9.7300  13.8449  4.0000  37.5000  116.0768  8.5000  8.3122  2.0000
56      0.9049  0.4056  59.0626  3.5027  0.7640  0.0021  0.9745  0.0000
57      -3.5500  2.9000  1.0493  4.0000  2.9225  1.3000  0.2000  13.0000
```

```

58 Si 2.2902 4.0000 28.0600 1.8354 0.2110 0.5947 1.2962 4.0000
59 11.1336 3.1831 4.0000 21.7115 139.9309 4.2033 5.5558 0.0000
60 -1.0000 0.0000 104.0000 9.0751 23.8188 0.8381 0.8563 0.0000
61 -4.1684 2.0754 1.0338 4.0000 2.5791 1.4000 0.2000 13.0000
62 Li 1.9205 1.0000 6.9410 1.8896 0.0905 0.4668 -0.1000 1.0000
63 9.9084 1.0896 1.0000 0.0000 0.0000 -6.4188 15.0000 0.0000
64 -1.0000 0.0000 37.5000 5.4409 6.9107 0.1973 0.8563 0.0000
65 -25.0000 2.2989 1.0338 1.0000 2.8103 1.3000 0.2000 13.0000
66 F 1.2705 1.0000 18.9984 1.4100 0.0442 0.0135 -0.1000 7.0000
67 11.6107 5.4481 4.0000 62.1473 0.1252 15.4329 17.3228 0.0000
68 -1.0000 35.0000 1.5000 6.9821 4.1799 1.0561 0.0000 0.0000
69 -2.2869 2.7340 1.0493 4.0000 3.0013 0.0000 0.0000 0.0000
70 21 ! Nr of bonds; Edis1; Edis2; Edis3; pbel; pbo5; l3corr; pbo6; kov
71 ! pbe2; pbo3; pbo4; n.u1; pbo1; pbo2; ovcorr; n.u2
72 1 1 156.5953 100.0397 80.0000 -0.8157 -0.4591 1.0000 37.7369 0.4235
73 0.4527 -0.1000 9.2605 1.0000 -0.0750 6.8316 1.0000 0.0000
74 1 2 170.2316 0.0000 0.0000 -0.5931 0.0000 1.0000 6.0000 0.7140
75 5.2267 1.0000 0.0000 1.0000 -0.0500 6.8315 0.0000 0.0000
76 1 4 94.5912 50.1197 0.0000 -0.5712 -0.5558 1.0000 17.2117 0.0308
77 2.3951 -1.1892 8.6403 1.0000 -0.1028 5.4278 1.0000 0.0000
78 2 2 156.0973 0.0000 0.0000 -0.1377 0.0000 1.0000 6.0000 0.8240
79 2.9907 1.0000 0.0000 1.0000 -0.0593 4.8358 0.0000 0.0000
80 1 3 224.8293 31.8847 89.5456 -1.4925 -0.0850 1.0000 13.4838 1.1008
81 0.7387 -0.7228 5.1953 1.0000 -0.1175 6.4319 0.0000 0.0000
82 3 3 142.2858 145.0000 50.8293 0.2506 -0.1000 1.0000 29.7503 0.6051
83 0.3451 -0.1055 9.0000 1.0000 -0.1225 5.5000 1.0000 0.0000
84 2 3 160.0000 0.0000 0.0000 -0.5725 0.0000 1.0000 6.0000 0.5626
85 1.1150 1.0000 0.0000 0.0000 -0.0920 4.2790 0.0000 0.0000
86 2 4 101.1840 0.0000 0.0000 -0.1751 0.0000 1.0000 6.0000 1.1044
87 7.3549 1.0000 0.0000 1.0000 -0.0450 7.9080 0.0000 0.0000
88 3 4 274.8339 5.0000 0.0000 -0.5884 -0.3000 1.0000 36.0000 0.2131
89 9.9772 -0.2572 28.8153 1.0000 -0.1130 8.4790 6.0658 0.0000
90 4 4 61.1127 85.8146 30.0000 -0.8197 -0.3000 1.0000 16.0000 0.1386
91 0.1307 -0.8055 7.1248 1.0000 -0.0674 8.2374 0.0000 0.0000
92 1 5 10.0540 0.0000 0.0000 0.3005 -0.3000 0.0000 6.0000 0.2953
93 0.2679 -0.2534 12.0019 1.0000 -0.1143 7.5211 0.0000 0.0000
94 2 5 63.4649 0.0000 0.0000 0.0294 0.0000 0.0000 6.0000 0.4868
95 0.3090 0.0000 12.0000 1.0000 -0.0800 5.1033 0.0000 0.0000
96 5 3 78.3666 -0.0200 0.0000 -1.0000 0.3000 0.0000 6.0000 0.3228
97 0.2022 -0.2500 11.9965 1.0000 -0.1276 7.8656 0.0000 0.0000
98 5 4 23.1963 0.0000 0.0000 1.0000 0.3000 0.0000 26.0000 0.5185
99 0.0812 0.0000 12.0000 1.0000 -0.1142 6.0525 0.0000 0.0000
100 5 5 16.7443 0.0000 0.0000 1.0420 0.3000 0.0000 26.0659 0.5820
101 1.6137 -0.0805 12.0000 1.0000 -0.1646 4.7897 0.0000 0.0000
102 1 6 166.8800 0.0000 0.0000 0.4753 -0.5000 1.0000 35.0000 1.3151
103 3.1303 -0.2500 15.0000 1.0000 -0.9475 7.1188 1.0000 0.0000
104 6 2 260.6892 0.0000 0.0000 -0.6690 0.0000 1.0000 6.0000 2.3211
105 8.8937 1.0000 0.0000 1.0000 -0.3966 9.2031 0.0000 0.0000
106 6 3 99.9065 0.0000 0.0000 -1.0000 0.0000 1.0000 6.0000 0.7194
107 0.5928 1.0000 0.0000 1.0000 -0.1318 8.4278 0.0000 0.0000
108 6 6 65.8563 0.0000 0.0000 -0.0630 -0.5267 1.0116 30.2616 0.2245
109 -0.2306 -0.2161 15.3928 1.0000 -0.1007 8.6628 0.0597 0.0000
110 6 5 24.7086 0.0000 0.0000 -1.3775 -0.0961 0.4644 45.9272 0.6224
111 6.9172 -0.0851 14.8066 1.0000 -0.0752 9.0692 0.7043 0.0000
112 6 4 284.8610 0.0000 0.0000 -0.8680 -0.5000 1.0000 35.0000 1.4117
113 3.5449 -0.2500 15.0000 1.0000 -0.1198 6.0380 1.0000 0.0000
114 15 ! Nr of off-diagonal terms; Ediss; Rvdw; alfa; cov.r; cov.r2; cov.r3
115 1 2 0.1219 1.4000 9.8442 1.1203 -1.0000 -1.0000
116 1 3 0.1893 1.7076 10.2970 1.3608 1.0384 1.0646
117 1 4 0.5876 1.3349 13.4198 1.4988 1.6946 -1.0000

```

|     |    |   |                                                         |         |         |        |         |         |         |        |
|-----|----|---|---------------------------------------------------------|---------|---------|--------|---------|---------|---------|--------|
| 118 | 2  | 3 | 0.0283                                                  | 1.2885  | 10.9190 | 0.9215 | -1.0000 | -1.0000 |         |        |
| 119 | 2  | 4 | 0.1035                                                  | 1.3327  | 11.5963 | 1.3977 | -1.0000 | -1.0000 |         |        |
| 120 | 3  | 4 | 0.1836                                                  | 1.9157  | 10.9070 | 1.7073 | 1.2375  | -1.0000 |         |        |
| 121 | 1  | 5 | 0.0610                                                  | 1.5665  | 11.4404 | 1.2079 | -1.0000 | -1.0000 |         |        |
| 122 | 2  | 5 | 0.2966                                                  | 1.2550  | 10.2920 | 1.1989 | -1.0000 | -1.0000 |         |        |
| 123 | 5  | 3 | 0.0790                                                  | 2.2000  | 9.0491  | 1.8165 | -1.0000 | 1.0000  |         |        |
| 124 | 5  | 4 | 0.1271                                                  | 2.0090  | 11.5659 | 1.7156 | 1.0000  | 1.0000  |         |        |
| 125 | 1  | 6 | 0.0749                                                  | 1.7702  | 12.0430 | 1.6315 | -1.0000 | -1.0000 |         |        |
| 126 | 6  | 2 | 0.0702                                                  | 1.1145  | 12.1833 | 1.0722 | -1.0000 | -1.0000 |         |        |
| 127 | 6  | 3 | 0.1293                                                  | 1.3773  | 11.4683 | 1.3410 | -1.0000 | -1.0000 |         |        |
| 128 | 6  | 5 | 0.0495                                                  | 1.2573  | 15.6983 | 0.9415 | -1.0000 | -1.0000 |         |        |
| 129 | 6  | 4 | 0.0996                                                  | 1.5863  | 13.3401 | 1.5077 | -1.0000 | -1.0000 |         |        |
| 130 | 52 |   | ! Nr of angles; Theta0; ka; kb; pconj; pv2; kpenal; pv3 |         |         |        |         |         |         |        |
| 131 | 1  | 1 | 1                                                       | 67.2326 | 22.0695 | 1.6286 | 0.0000  | 1.7959  | 15.4141 | 1.8089 |
| 132 | 1  | 1 | 2                                                       | 65.2527 | 14.3185 | 6.2977 | 0.0000  | 0.5645  | 0.0000  | 1.1530 |
| 133 | 2  | 1 | 2                                                       | 70.0840 | 25.3540 | 3.4508 | 0.0000  | 0.0050  | 0.0000  | 3.0000 |
| 134 | 1  | 2 | 2                                                       | 0.0000  | 0.0000  | 6.0000 | 0.0000  | 0.0000  | 0.0000  | 1.0400 |
| 135 | 1  | 2 | 1                                                       | 0.0000  | 3.4110  | 7.7350 | 0.0000  | 0.0000  | 0.0000  | 1.0400 |
| 136 | 2  | 2 | 2                                                       | 0.0000  | 27.9213 | 5.8635 | 0.0000  | 0.0000  | 0.0000  | 1.0400 |
| 137 | 1  | 1 | 3                                                       | 94.2903 | 59.3577 | 5.0000 | 0.0000  | 1.8747  | 1.0000  | 1.3538 |
| 138 | 3  | 1 | 3                                                       | 86.8971 | 23.9117 | 5.0000 | 0.0000  | 0.0499  | 1.0000  | 2.8723 |
| 139 | 1  | 3 | 1                                                       | 49.8324 | 39.3271 | 5.0000 | 0.0000  | 3.0156  | 0.0000  | 2.7534 |
| 140 | 1  | 3 | 2                                                       | 70.1101 | 13.1217 | 4.4734 | 0.0000  | 0.8433  | 0.0000  | 3.0000 |
| 141 | 1  | 3 | 3                                                       | 81.9029 | 32.2258 | 1.7397 | 0.0000  | 0.9888  | 68.1072 | 1.7777 |
| 142 | 1  | 2 | 3                                                       | 0.0000  | 25.0000 | 3.0000 | 0.0000  | 1.0000  | 0.0000  | 1.0400 |
| 143 | 3  | 3 | 3                                                       | 80.7324 | 30.4554 | 0.9953 | 0.0000  | 1.6310  | 50.0000 | 1.0783 |
| 144 | 2  | 3 | 3                                                       | 75.6935 | 50.0000 | 2.0000 | 0.0000  | 1.0000  | 0.0000  | 1.1680 |
| 145 | 2  | 3 | 2                                                       | 85.8000 | 9.8453  | 2.2720 | 0.0000  | 2.8635  | 0.0000  | 1.5800 |
| 146 | 3  | 2 | 3                                                       | 0.0000  | 15.0000 | 2.8900 | 0.0000  | 0.0000  | 0.0000  | 2.8774 |
| 147 | 2  | 2 | 3                                                       | 0.0000  | 8.5744  | 3.0000 | 0.0000  | 0.0000  | 0.0000  | 1.0421 |
| 148 | 4  | 4 | 4                                                       | 66.2921 | 19.5195 | 0.9624 | 0.0000  | 0.1000  | 0.0000  | 1.2636 |
| 149 | 2  | 4 | 4                                                       | 68.5501 | 19.4239 | 2.3592 | 0.0000  | 0.2029  | 0.0000  | 1.0000 |
| 150 | 2  | 4 | 2                                                       | 70.7499 | 11.4850 | 4.6606 | 0.0000  | 1.5647  | 0.0000  | 1.0902 |
| 151 | 3  | 4 | 4                                                       | 86.3294 | 18.3879 | 5.8529 | 0.0000  | 1.7361  | 0.0000  | 1.2310 |
| 152 | 2  | 4 | 3                                                       | 73.6998 | 40.0000 | 1.8782 | 0.0000  | 4.0000  | 0.0000  | 1.1290 |
| 153 | 3  | 4 | 3                                                       | 79.5581 | 34.9140 | 1.0801 | 0.0000  | 0.1632  | 0.0000  | 2.2206 |
| 154 | 4  | 3 | 4                                                       | 82.3364 | 4.7350  | 1.3544 | 0.0000  | 1.4627  | 0.0000  | 1.0400 |
| 155 | 2  | 3 | 4                                                       | 90.0000 | 6.6857  | 1.6689 | 0.0000  | 2.5771  | 0.0000  | 1.0400 |
| 156 | 3  | 3 | 4                                                       | 92.1207 | 24.3937 | 0.5000 | 0.0000  | 1.7208  | 0.0000  | 3.0000 |
| 157 | 2  | 2 | 4                                                       | 0.0000  | 0.0100  | 1.0000 | 0.0000  | 1.0000  | 0.0000  | 2.0000 |
| 158 | 4  | 2 | 4                                                       | 0.0000  | 4.4216  | 0.8596 | 0.0000  | 0.9624  | 0.0000  | 1.0000 |
| 159 | 3  | 2 | 4                                                       | 0.0000  | 5.0000  | 1.0000 | 0.0000  | 1.0000  | 0.0000  | 1.2500 |
| 160 | 3  | 5 | 3                                                       | 60.0000 | 0.0000  | 1.0000 | 0.0000  | 1.0000  | 0.0000  | 1.0000 |
| 161 | 5  | 3 | 3                                                       | 81.6233 | 30.0000 | 2.0000 | 0.0000  | 1.0000  | 0.0000  | 1.0000 |
| 162 | 5  | 3 | 5                                                       | 67.5247 | 6.4512  | 4.0000 | 0.0000  | 1.0000  | 0.0000  | 2.8079 |
| 163 | 5  | 3 | 4                                                       | 62.6634 | 8.4441  | 2.5120 | 0.0000  | 1.0000  | 0.0000  | 1.0000 |
| 164 | 1  | 5 | 3                                                       | 0.0000  | 0.0100  | 1.0000 | 0.0000  | 1.0000  | 0.0000  | 1.0000 |
| 165 | 1  | 3 | 5                                                       | 98.9874 | 6.7756  | 0.2680 | 0.0000  | 3.8836  | 0.0000  | 1.0000 |
| 166 | 5  | 1 | 3                                                       | 99.6399 | 0.0100  | 3.8420 | 0.0000  | 2.0653  | 0.0000  | 1.8902 |
| 167 | 1  | 1 | 4                                                       | 70.8533 | 23.2816 | 2.7470 | 0.0000  | 2.0166  | 0.0000  | 2.2246 |
| 168 | 1  | 4 | 1                                                       | 69.9335 | 20.9406 | 1.8375 | 0.0000  | 0.2981  | 0.0000  | 2.1195 |
| 169 | 4  | 1 | 4                                                       | 50.9317 | 18.9333 | 1.8833 | 0.0000  | 0.2981  | 0.0000  | 2.3646 |
| 170 | 1  | 4 | 4                                                       | 69.3369 | 19.6964 | 2.0703 | 0.0000  | 1.0031  | 0.0000  | 1.0400 |
| 171 | 2  | 1 | 4                                                       | 72.5949 | 13.8347 | 2.4952 | 0.0000  | 1.0000  | 0.0000  | 1.0400 |
| 172 | 1  | 4 | 2                                                       | 72.5949 | 14.8347 | 2.4952 | 0.0000  | 1.0000  | 0.0000  | 1.0400 |
| 173 | 1  | 2 | 4                                                       | 0.0000  | 2.5000  | 1.0000 | 0.0000  | 1.0000  | 0.0000  | 1.2500 |
| 174 | 1  | 1 | 6                                                       | 35.0676 | 44.0627 | 0.4803 | 0.0000  | 0.1357  | 0.0000  | 0.6875 |
| 175 | 6  | 1 | 6                                                       | 90.2886 | 41.7871 | 0.4774 | 0.0000  | 0.2704  | 0.0000  | 0.6548 |
| 176 | 1  | 6 | 1                                                       | 82.4766 | 33.5783 | 0.1356 | 0.0000  | 0.2024  | 0.0000  | 0.9612 |
| 177 | 1  | 6 | 6                                                       | 2.0340  | 25.1860 | 1.0950 | 0.0000  | 0.1315  | 0.0000  | 0.9638 |

|     |    |                                                         |   |         |         |          |         |          |         |        |        |
|-----|----|---------------------------------------------------------|---|---------|---------|----------|---------|----------|---------|--------|--------|
| 178 | 5  | 6                                                       | 5 | 75.9308 | 39.5963 | 1.5406   | 0.0000  | 5.0016   | 0.0000  | 1.2226 |        |
| 179 | 6  | 5                                                       | 6 | 85.2677 | 38.4940 | 1.6737   | 0.0000  | 5.0138   | 0.0000  | 1.3107 |        |
| 180 | 6  | 3                                                       | 6 | 86.4972 | 15.1409 | 1.1470   | 0.0000  | 0.2045   | 0.0000  | 2.4012 |        |
| 181 | 6  | 3                                                       | 3 | 73.0506 | 30.3751 | 2.0217   | 0.0000  | 1.7756   | 0.0000  | 2.9301 |        |
| 182 | 6  | 4                                                       | 6 | 79.1640 | 38.5410 | 1.3735   | 0.0000  | 4.9517   | 0.0000  | 2.2216 |        |
| 183 | 34 | ! Nr of torsions; V1; V2; V3; V2(BO); vconj; n.u1; n.u2 |   |         |         |          |         |          |         |        |        |
| 184 | 1  | 1                                                       | 1 | 1       | -0.2500 | 11.5822  | 0.1899  | -4.7057  | -2.2047 | 0.0000 | 0.0000 |
| 185 | 1  | 1                                                       | 1 | 2       | -0.2500 | 31.2596  | 0.1709  | -4.6391  | -1.9002 | 0.0000 | 0.0000 |
| 186 | 2  | 1                                                       | 1 | 2       | -0.1770 | 30.0252  | 0.4340  | -5.0019  | -2.0697 | 0.0000 | 0.0000 |
| 187 | 1  | 1                                                       | 1 | 3       | -0.5000 | 5.0000   | -0.5000 | -9.0000  | -1.0000 | 0.0000 | 0.0000 |
| 188 | 2  | 1                                                       | 1 | 3       | -0.5000 | 8.1082   | 0.1710  | -8.1074  | -1.0000 | 0.0000 | 0.0000 |
| 189 | 3  | 1                                                       | 1 | 3       | -1.4477 | 16.6853  | 0.6461  | -4.9622  | -1.0000 | 0.0000 | 0.0000 |
| 190 | 1  | 1                                                       | 3 | 1       | -0.2300 | 46.8253  | -0.2848 | -2.6326  | -1.0000 | 0.0000 | 0.0000 |
| 191 | 1  | 1                                                       | 3 | 2       | 1.2044  | 80.0000  | -0.3139 | -6.1481  | -1.0000 | 0.0000 | 0.0000 |
| 192 | 2  | 1                                                       | 3 | 1       | -2.5000 | 31.0191  | 0.6165  | -2.7733  | -2.9807 | 0.0000 | 0.0000 |
| 193 | 2  | 1                                                       | 3 | 2       | -2.4875 | 70.8145  | 0.7582  | -4.2274  | -3.0000 | 0.0000 | 0.0000 |
| 194 | 1  | 1                                                       | 3 | 3       | -0.0002 | 20.1851  | 0.1601  | -9.0000  | -2.0000 | 0.0000 | 0.0000 |
| 195 | 2  | 1                                                       | 3 | 3       | -1.4383 | 80.0000  | 1.0000  | -3.6877  | -2.8000 | 0.0000 | 0.0000 |
| 196 | 3  | 1                                                       | 3 | 1       | -1.2244 | 77.8133  | -0.4738 | -4.7499  | -3.0000 | 0.0000 | 0.0000 |
| 197 | 3  | 1                                                       | 3 | 2       | -2.5000 | 70.3345  | -1.0000 | -5.5315  | -3.0000 | 0.0000 | 0.0000 |
| 198 | 3  | 1                                                       | 3 | 3       | -0.1583 | 20.0000  | 1.5000  | -9.0000  | -2.0000 | 0.0000 | 0.0000 |
| 199 | 1  | 3                                                       | 3 | 1       | 0.0002  | 80.0000  | -1.5000 | -4.4848  | -2.0000 | 0.0000 | 0.0000 |
| 200 | 1  | 3                                                       | 3 | 2       | -2.1289 | 12.8382  | 1.0000  | -5.6657  | -2.9759 | 0.0000 | 0.0000 |
| 201 | 1  | 3                                                       | 3 | 3       | 2.5000  | -25.0000 | 1.0000  | -2.5000  | -1.0000 | 0.0000 | 0.0000 |
| 202 | 2  | 3                                                       | 3 | 3       | 0.8302  | -4.0000  | -0.7763 | -2.5000  | -1.0000 | 0.0000 | 0.0000 |
| 203 | 3  | 3                                                       | 3 | 3       | -2.5000 | -4.0000  | 1.0000  | -2.5000  | -1.0000 | 0.0000 | 0.0000 |
| 204 | 0  | 1                                                       | 1 | 0       | 0.0000  | 0.0000   | 0.0000  | 0.0000   | 0.0000  | 0.0000 | 0.0000 |
| 205 | 0  | 1                                                       | 2 | 0       | 0.0000  | 0.0000   | 0.0000  | 0.0000   | 0.0000  | 0.0000 | 0.0000 |
| 206 | 0  | 2                                                       | 2 | 0       | 0.0000  | 0.0000   | 0.0000  | 0.0000   | 0.0000  | 0.0000 | 0.0000 |
| 207 | 0  | 2                                                       | 3 | 0       | 0.0000  | 0.1000   | 0.0200  | -2.5415  | 0.0000  | 0.0000 | 0.0000 |
| 208 | 0  | 3                                                       | 3 | 0       | 0.5511  | 25.4150  | 1.1330  | -5.1903  | -1.0000 | 0.0000 | 0.0000 |
| 209 | 2  | 4                                                       | 4 | 2       | 0.0000  | 0.0000   | 0.0640  | -2.4426  | 0.0000  | 0.0000 | 0.0000 |
| 210 | 2  | 4                                                       | 4 | 4       | 0.0000  | 0.0000   | 0.1587  | -2.4426  | 0.0000  | 0.0000 | 0.0000 |
| 211 | 0  | 2                                                       | 4 | 0       | 0.0000  | 0.0000   | 0.1200  | -2.4847  | 0.0000  | 0.0000 | 0.0000 |
| 212 | 1  | 1                                                       | 1 | 6       | 0.0000  | 42.3172  | 3.4546  | -22.6501 | -1.7255 | 0.0000 | 0.0000 |
| 213 | 6  | 1                                                       | 1 | 6       | 0.0000  | 75.5402  | -0.7497 | -4.0257  | -1.7255 | 0.0000 | 0.0000 |
| 214 | 0  | 1                                                       | 6 | 0       | 4.0000  | 45.8264  | 0.9000  | -4.0000  | 0.0000  | 0.0000 | 0.0000 |
| 215 | 0  | 6                                                       | 6 | 0       | 4.0000  | 45.8264  | 0.9000  | -4.0000  | 0.0000  | 0.0000 | 0.0000 |
| 216 | 0  | 5                                                       | 6 | 0       | 0.0336  | 0.6333   | -0.0621 | -0.0007  | -0.0578 | 0.0000 | 0.0000 |
| 217 | 0  | 4                                                       | 6 | 0       | 4.7334  | 44.7693  | 1.2361  | -4.7157  | 0.0000  | 0.0000 | 0.0000 |
| 218 | 2  | ! Nr of hydrogen bonds; Rhb; Dehb; vhb1; vhb2           |   |         |         |          |         |          |         |        |        |
| 219 | 3  | 2                                                       | 3 | 2.1200  | -3.5800 | 1.4500   | 19.5000 |          |         |        |        |
| 220 | 6  | 2                                                       | 3 | 2.1200  | -2.0000 | 1.4500   | 19.5000 |          |         |        |        |

## References

1. Wilkinson, M. D. *et al.* The fair guiding principles for scientific data management and stewardship. *Sci. data* **3**, 1–9, DOI: <https://doi.org/10.1038/sdata.2016.18> (2016).
2. Winter, M. The solid electrolyte interphase—the most important and the least understood solid electrolyte in rechargeable li batteries. *Zeitschrift für physikalische Chemie* **223**, 1395–1406, DOI: <https://doi.org/10.1524/zpch.2009.6086> (2009).
3. Van Duin, A. C., Dasgupta, S., Lorant, F. & Goddard, W. A. Reaxff: a reactive force field for hydrocarbons. *The J. Phys. Chem. A* **105**, 9396–9409, DOI: <https://doi.org/10.1021/jp004368u> (2001).
4. Amsterdam Modeling Suite, SCM website.
5. Komissarov, L., Ruger, R., Hellstrom, M. & Verstraelen, T. Params: parameter optimization for atomistic and molecular simulations. *J. Chem. Inf. Model.* **61**, 3737–3743, DOI: <https://doi.org/10.1021/acs.jcim.1c00333> (2021).



6. Celik, F. A. & Karabulut, E. A new design of borax-cannabinol nanomaterial used to strengthen concrete structures: Non-scc-gfn1xtb model. *Solid State Commun.* **358**, 114995, DOI: <https://doi.org/10.1016/j.ssc.2022.114995> (2022).
7. Yun, K.-S. *et al.* Simulation protocol for prediction of a solid-electrolyte interphase on the silicon-based anodes of a lithium-ion battery: Reaxff reactive force field. *The J. Phys. Chem. Lett.* **8**, 2812–2818, DOI: <https://doi.org/10.1021/acs.jpcllett.7b00898> (2017).
8. Wang, Y., Liu, Y., Tu, Y. & Wang, Q. Reductive decomposition of solvents and additives toward solid-electrolyte interphase formation in lithium-ion battery. *The J. Phys. Chem. C* **124**, 9099–9108, DOI: <https://doi.org/10.1021/acs.jpcc.9b10535> (2020).
9. Jain, A. *et al.* Commentary: The materials project: A materials genome approach to accelerating materials innovation. *APL materials* **1**, 011002, DOI: <https://doi.org/10.1063/1.4812323> (2013).
